# Supplementary material for: Anomalous enhancement of valley polarization in multilayer WS2at room temperature
Source: Royal Society of Chemistry journal article supplement (doi:10.1039/c7nr00554g), 2017-01-01
Supplement: c7nr00554g1.pdf [file c7nr00554g1.pdf]

# Anomalous enhancement of valley polarization in multilayer WS<sub>2</sub> at room temperature

Huimin Su, Chengrong Wei, Aiyong Deng, Dongmei Deng, Chunlei Yang, Jun-Feng Dai

## Supplementary Information

### 1. Second harmonic generation measurement

The angle-dependent intensity of parallel (black squares) and perpendicular (red circles) components of the second harmonic generation (SHG) signal are shown in Fig. S1b. The fitting of the experimental data to the expected quadratic dependence of  $\sin(3\theta)$  and  $\cos(3\theta)$  indicates the high crystal symmetry and orientation of the monolayer WS<sub>2</sub>. The mapping of SHG intensity as fixed angle is shown in Fig. S1c. The SHG signal is uniform over the entire monolayer flake, which justify low grain boundaries on exfoliated WS<sub>2</sub> samples.

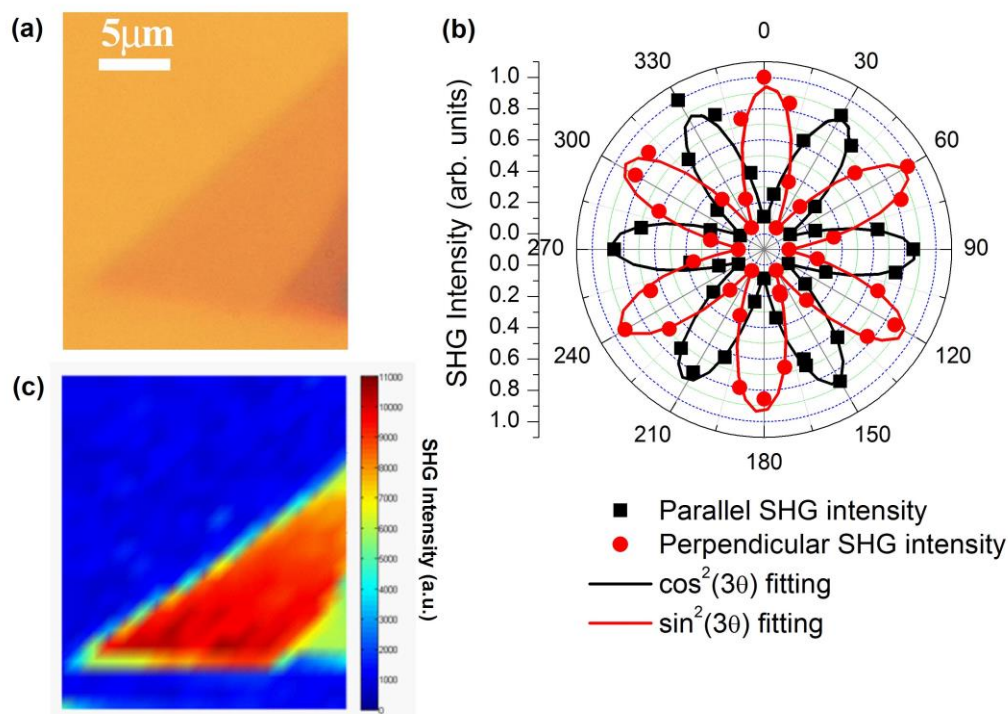

Figure S1: (a) Optical image of monolayer WS<sub>2</sub>. (b) The intensity of parallel (blue squares) and perpendicular (black circles) components of second harmonic generation signal as a function of  $\theta$ , the

angle between the laboratory and the crystalline coordinates. The black (red) solid line indicates the expected  $\sin^2 3\theta$  ( $\cos^2 3\theta$ ) dependence. (c) The parallel component of SHG image of a monolayer WS<sub>2</sub> on 0° angle.

## 2. Photoluminescence (PL) spectrum

The 2-dimensional optical image and mapping of PL of monolayer WS<sub>2</sub> are shown in Figure S2 (a) and (b), respectively, which supports high quality and uniform of monolayer WS<sub>2</sub> sample.

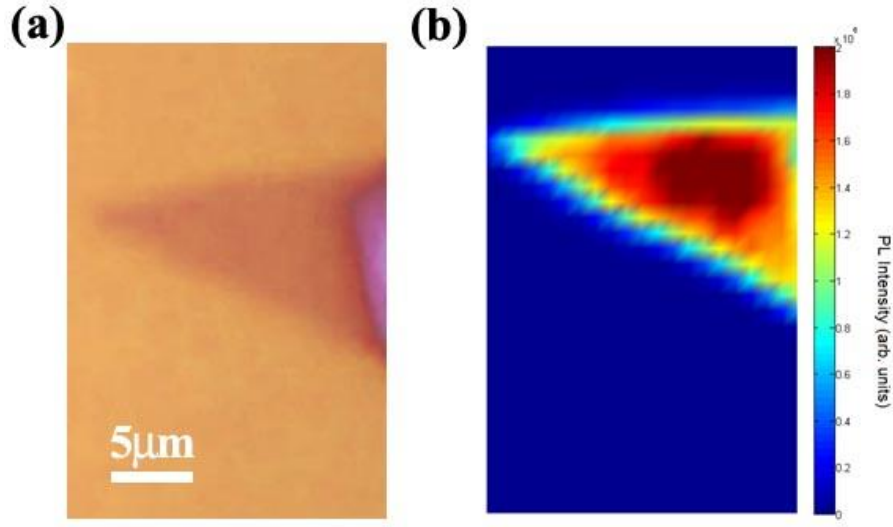

Figure S2: (a) optical image of monolayer WS<sub>2</sub> (b) the photoluminescence (PL) image of a monolayer WS<sub>2</sub>.

## 3. Valley polarization measurement

The degree of circular polarization of photoluminescence is evaluated at PL peak from exciton emission with 10nm bandwidth by using the following equation:

$$P = \frac{I_{\sigma+} - I_{\sigma-}}{I_{\sigma+} + I_{\sigma-}}$$

where  $I_{\sigma+}$  ( $I_{\sigma-}$ ) is the intensity of left-handed (right-handed) circularly polarized photoluminescence. The valley polarization as a function of emission energy is shown in Fig. S2 and Fig. S3.

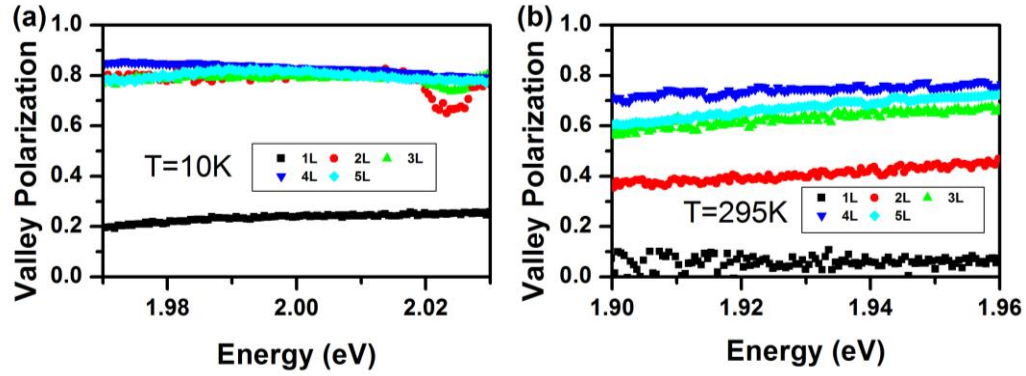

Figure S2: The valley polarization as a function of emission energy around PL peak for 1- to 5- layer  $\text{WS}_2$ . The single-frequency laser with an energy of 2.088 eV is used to excite monolayer and multilayer  $\text{WS}_2$  at (a) 10 K and (b) 295 K.

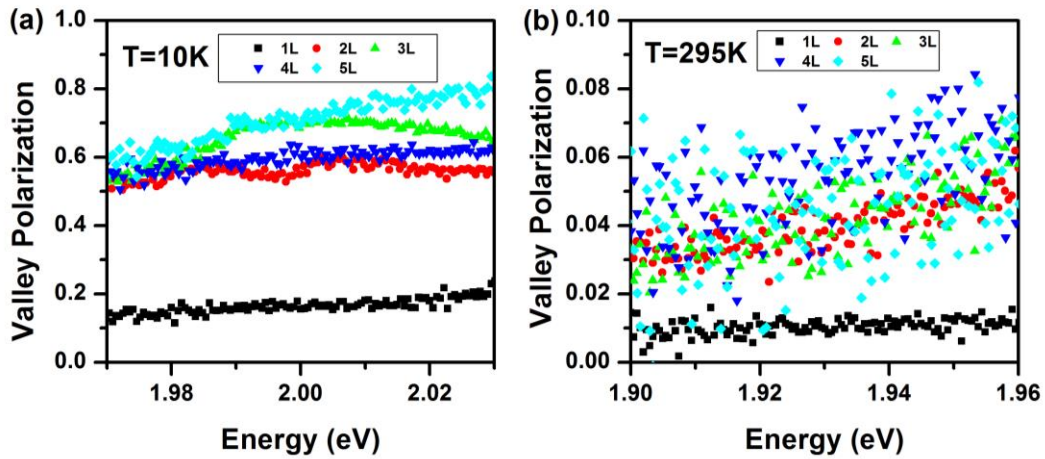

Figure S3: The valley polarization as a function of emission energy around PL peak for 1- to 5- layer  $\text{WS}_2$ . The single-frequency laser with an energy of 2.33 eV under the off-resonant condition, is used to excite monolayer and multilayer  $\text{WS}_2$  at (a) 10 K and (b) 295 K.

#### 4. Valley polarization in multilayer $\text{WS}_2$ samples at various temperature

The valley polarization in 2L, 3L 4L and 5L  $\text{WS}_2$  samples as a function of temperature are shown in Fig. S4. The valley polarization in bilayer and trilayer  $\text{WS}_2$  exhibits obvious temperature dependence above around 200K, while it is weakly temperature dependent in 4L and 5L samples. Above around 200K, the most apparent drop of valley polarization is observed on bilayer  $\text{WS}_2$ .

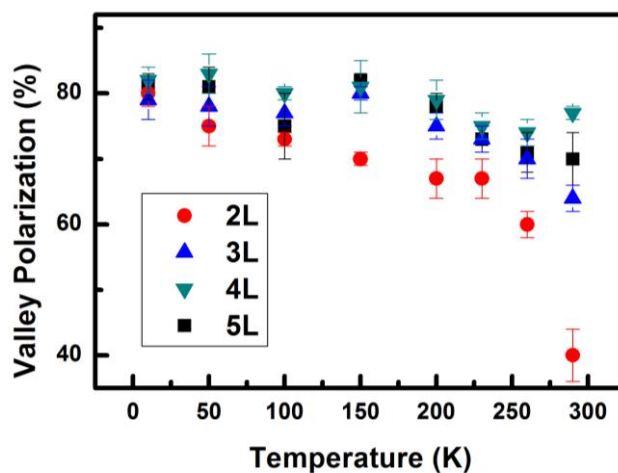

Figure S4: The valley polarization of multilayer  $\text{WS}_2$  (including 2, 3, 4, 5 layers) as a function of temperature.
